# Supplementary material for: Sensory retraining of the leg after stroke: systematic review and meta-analysis
Source: PubMed Central journal article supplement — Clin Rehabil. 2019 Mar 22;33(6):964–79. doi: 10.1177/0269215519836461 (PMC6557007; doi:10.1177/0269215519836461), 2019-03-22
Supplement: Supplemental_Material.pdf [file Supplemental_Material.pdf]

## Supplemental Material

**Table S1. Search strategy for MEDLINE Complete.**

---

|    |                                                                                                                                                                                          |
|----|------------------------------------------------------------------------------------------------------------------------------------------------------------------------------------------|
| S1 | Stroke OR cerebrovasc* OR CVA OR hemipl* OR hemipar* [human][all adult: 19+ years]                                                                                                       |
| S2 | “Lower extremit*” OR “leg*” OR leg OR thigh OR hip OR knee OR ankle OR foot OR toe<br>[human][all adult: 19+ years]                                                                      |
| S3 | Sensation OR sensory OR tactile OR somatosens* OR propriocepti* OR kin*sthesi* OR touch OR<br>“position sense” OR discriminati* OR stereognosis OR vibrat* [human][all adult: 19+ years] |
| S4 | Retraining OR training OR education OR rehabilitation OR stimulation [human][all adult: 19+<br>years]                                                                                    |
| S5 | S1 AND S2 AND S3 AND S4                                                                                                                                                                  |

---

CVA – cerebrovascular accident; S – search.

**Table S2. Quality appraisal summary.**

| Study                                     | Component      |              |             |          |                                            |                        | Global Rating |
|-------------------------------------------|----------------|--------------|-------------|----------|--------------------------------------------|------------------------|---------------|
|                                           | Selection Bias | Study Design | Confounders | Blinding | Data Collection Methods                    | Withdrawals & Dropouts |               |
| <b>Aruin 2012<sup>46</sup></b>            | Moderate       | Strong       | Weak        | Weak     | Strong                                     | Strong                 | Weak          |
| <b>Cordo 2009<sup>39</sup></b>            | Weak           | Weak         | NA          | Weak     | Strong (gait);<br>Weak (sensory)           | Strong                 | Weak          |
| <b>Da Silva Ribeiro 2015<sup>51</sup></b> | Weak           | Strong       | Strong      | Moderate | Strong                                     | Strong                 | Moderate      |
| <b>Han 2013<sup>40</sup></b>              | Weak           | Strong       | Strong      | Weak     | Strong                                     | Strong                 | Weak          |
| <b>Hillier 2006<sup>23</sup></b>          | Weak           | Moderate     | Weak        | Moderate | Strong (balance);<br>Weak (sensory)        | Strong                 | Weak          |
| <b>Huzmeli 2017<sup>41</sup></b>          | Weak           | Strong       | Strong      | Weak     | Strong (balance);<br>Weak (sensory)        | Moderate               | Weak          |
| <b>Kwon 2013<sup>52</sup></b>             | Weak           | Strong       | Strong      | Weak     | Strong                                     | NA                     | Weak          |
| <b>Lee 2015<sup>42</sup></b>              | Weak           | Strong       | Strong      | Weak     | Strong                                     | Strong                 | Weak          |
| <b>Lynch 2007<sup>22</sup></b>            | Moderate       | Strong       | Strong      | Strong   | Strong (balance &<br>gait); Weak (sensory) | Strong                 | Moderate      |
| <b>Mazuchi 2018<sup>47</sup></b>          | Weak           | Strong       | Strong      | Strong   | Strong                                     | Strong                 | Moderate      |
| <b>Mohapatra 2012<sup>38</sup></b>        | Moderate       | Strong       | Strong      | Weak     | Strong                                     | Strong                 | Moderate      |
| <b>Moon 2015<sup>43</sup></b>             | Weak           | Strong       | Strong      | Weak     | Strong                                     | Strong                 | Weak          |
| <b>Morioka 2003<sup>44</sup></b>          | Moderate       | Strong       | Strong      | Strong   | Weak                                       | Strong                 | Moderate      |
| <b>Peurala 2002<sup>45</sup></b>          | Weak           | Strong       | Weak        | Moderate | Strong (Motor);<br>Weak (sensory)          | Strong                 | Weak          |
| <b>Tyson 2013<sup>49</sup></b>            | Weak           | Strong       | Strong      | Moderate | Strong                                     | NA                     | Moderate      |
| <b>Zankel 1969<sup>48</sup></b>           | Weak           | Strong       | Weak        | Weak     | Strong                                     | Weak                   | Weak          |

NA – not applicable

**Table S3. Intervention effects.**

| Primary author & year      | Outcome measures                                | Post-treatment mean (SD) of included studies |               | Mean difference between groups | Effect size (SMD)  | Bias corrected (Hedges' <i>g</i> ) | 95% CI      |
|----------------------------|-------------------------------------------------|----------------------------------------------|---------------|--------------------------------|--------------------|------------------------------------|-------------|
|                            |                                                 | Experimental group                           | Control group |                                |                    |                                    |             |
| <b>SOMATOSENSORY</b>       |                                                 |                                              |               |                                |                    |                                    |             |
| Cordo 2009 <sup>39</sup>   | Days to 90% recovery of JPS (exponential)       | NA <sup>a</sup>                              |               |                                |                    |                                    |             |
| Han 2013 <sup>40</sup>     | JPS error (°)                                   | 3.07(1.34)                                   | 3.58(1.52)    | 0.51 <sup>c</sup>              | 0.36 <sup>c</sup>  | 0.35 <sup>c</sup>                  | -0.15, 0.85 |
| Hillier 2006 <sup>23</sup> | DPT                                             | NA <sup>a,e</sup>                            |               |                                |                    |                                    |             |
|                            | SWM light touch test (normal 2.83)              | NA <sup>a</sup>                              |               |                                |                    |                                    |             |
| Huzmeli 2017 <sup>41</sup> | DPT                                             | NA <sup>d</sup>                              |               |                                |                    |                                    |             |
|                            | SWM light touch test(normal 2.83)               | 3.53(0.73)                                   | 3.75(0.61)    | 0.22 <sup>c</sup>              | 0.33 <sup>c</sup>  | 0.32 <sup>c</sup>                  | -0.46, 1.09 |
|                            | 2-point discrimination (cm)                     | 7.28(3.12)                                   | 10.73(3.93)   | 3.45 <sup>c</sup>              | 0.97 <sup>c</sup>  | 0.94 <sup>c</sup>                  | 0.13, 1.75  |
| Kwon 2013 <sup>52</sup>    | Knee JPS error rate – RPM group (PAR; %)        | 4.27(2.07)                                   | 7.84(3.04)    | 3.57 <sup>c</sup>              | 1.48 <sup>c</sup>  | 1.42 <sup>c</sup>                  | 0.45, 2.39  |
|                            | Knee JPS error rate – RAM group (PAR; %)        | 8.58(3.73)                                   | 7.84(3.04)    | -0.74 <sup>c</sup>             | -0.21 <sup>c</sup> | -0.20 <sup>c</sup>                 | -1.08, 0.68 |
|                            | Knee JPS error rate – RPM group (AAR; %)        | 3.28(1.07)                                   | 6.68(2.34)    | 3.40 <sup>c</sup>              | 2.14 <sup>c</sup>  | 2.06 <sup>c</sup>                  | 1.00, 3.12  |
|                            | Knee JPS error rate – RAM group (AAR; %)        | 9.69(4.07)                                   | 6.68(2.34)    | -3.01 <sup>c</sup>             | -0.83 <sup>c</sup> | -0.80 <sup>c</sup>                 | -1.71, 0.11 |
| Lee 2015 <sup>42</sup>     | JPS error (unit NR)                             | 1.76(0.63)                                   | 3.11(0.80)    | 1.35 <sup>c</sup>              | 1.87 <sup>c</sup>  | 1.83 <sup>c</sup>                  | 1.05, 2.61  |
| Lynch 2007 <sup>22</sup>   | DPT (number of correct responses out of 10)     | NA <sup>d</sup>                              |               |                                |                    |                                    |             |
|                            | SWM light touch test (normal 2.83) <sup>f</sup> | 2.11(1.45)                                   | 2.45(1.29)    | 0.34 <sup>c</sup>              | 0.25 <sup>c</sup>  | 0.24 <sup>c</sup>                  | -0.62, 1.10 |

|                            |                                                       |                 |            |                    |                    |                    |             |
|----------------------------|-------------------------------------------------------|-----------------|------------|--------------------|--------------------|--------------------|-------------|
| Mazuchi 2018 <sup>47</sup> | Knee JPS absolute error (°)                           | 6.00(3.60)      | 4.60(3.00) | -1.40 <sup>c</sup> | -0.42 <sup>c</sup> | -0.39 <sup>c</sup> | -0.76, 1.53 |
| Moon 2015 <sup>43</sup>    | Knee JPS error (°)                                    | 6.80(3.67)      | 7.04(4.41) | 0.24 <sup>c</sup>  | 0.06 <sup>c</sup>  | 0.06 <sup>c</sup>  | -0.66, 0.77 |
| Morioka 2003 <sup>44</sup> | 2-point discrimination distance (unit NR)             | NA <sup>e</sup> |            |                    |                    |                    |             |
|                            | Hardness discrimination                               | NA <sup>e</sup> |            |                    |                    |                    |             |
| Peurala 2002 <sup>45</sup> | Skin sensitivity (VAS 0-20)                           | NA <sup>a</sup> |            |                    |                    |                    |             |
|                            | SEP (1=normal, 2 = minor change, 3 = abnormal)        | NA <sup>a</sup> |            |                    |                    |                    |             |
| Tyson 2013 <sup>49</sup>   | Ankle proprioception detection threshold – JPS PF (°) | NA <sup>b</sup> |            |                    |                    |                    |             |
|                            | Ankle proprioception detection threshold – JPS DF (°) | NA <sup>b</sup> |            |                    |                    |                    |             |
| Zankel 1969 <sup>48</sup>  | Vibration (microns)                                   | NA <sup>e</sup> |            |                    |                    |                    |             |

---

#### BALANCE

|                            |                                            |                 |              |                    |                   |                   |             |
|----------------------------|--------------------------------------------|-----------------|--------------|--------------------|-------------------|-------------------|-------------|
| Aruin 2012 <sup>46</sup>   | Weight distribution on affected side (%BW) | 49.20(3.20)     | 42.20(3.90)  | 7.00               | 1.96              | 1.87              | 0.76, 2.98  |
|                            | BBS (0-56)                                 | 44.80(4.00)     | 37.70(3.40)  | 7.10               | 1.91              | 1.82              | 0.72, 2.92  |
| Cordo 2009 <sup>39</sup>   | Weight distribution on affected side (%BW) | NA <sup>a</sup> |              |                    |                   |                   |             |
| Han 2013 <sup>40</sup>     | BBS (0-56)                                 | 44.16(7.84)     | 42.39(6.87)  | 1.77               | 0.24              | 0.24              | -0.26, 0.74 |
|                            | Postural sway area EO (mm <sup>2</sup> /s) | 38.89(21.21)    | 54.36(15.50) | 15.47 <sup>c</sup> | 0.83 <sup>c</sup> | 0.82 <sup>c</sup> | 0.30, 1.34  |
|                            | Postural sway area EC (mm <sup>2</sup> /s) | 35.56(12.72)    | 52.85(19.31) | 17.29 <sup>c</sup> | 1.06 <sup>c</sup> | 1.04 <sup>c</sup> | 0.51, 1.57  |
| Hillier 2006 <sup>23</sup> | Postural sway path length (unit NR)        | NA <sup>a</sup> |              |                    |                   |                   |             |
| Huzmeli 2017 <sup>41</sup> | BBS (0-56)                                 | 43.15(16.86)    | 41.15(11.81) | 2.00               | 0.14              | 0.13              | -0.64, 0.90 |

|                                 |                                                                     |                 |              |                    |                   |                   |                |
|---------------------------------|---------------------------------------------------------------------|-----------------|--------------|--------------------|-------------------|-------------------|----------------|
|                                 | FRT (cm) in sitting                                                 | 36.84(9.59)     | 24.30(6.99)  | 12.54              | 1.49              | 1.45              | 0.58, 2.31     |
| Lee 2015 <sup>42</sup>          | Weight distribution on affected side<br>(affected:unaffected ratio) | 9.48(5.80)      | 11.74(2.02)  | 2.26 <sup>c</sup>  | 0.52 <sup>c</sup> | 0.51 <sup>c</sup> | -0.15, 1.17    |
|                                 | BBS (0-56)                                                          | 44.61(6.08)     | 41.22(4.43)  | 3.39               | 0.64              | 0.62              | -0.04, 1.29    |
| Lynch 2007 <sup>22</sup>        | BBS (0-56)                                                          | 44.56(9.21)     | 43.91(11.21) | 0.65               | 0.06              | 0.06              | -0.80, 0.92    |
| Mohapatra<br>2012 <sup>38</sup> | Weight distribution on affected side (%BW)                          | 37.90(0.05)     | 27.40(0.06)  | 10.50              | 188.25            | 172.04            | 100.14, 243.94 |
|                                 | BBS (0-56)                                                          | 41.20(1.90)     | 36.70(2.40)  | 4.50               | 2.05              | 1.88              | 0.45, 3.30     |
| Morioka 2003 <sup>44</sup>      | Postural sway locus length EO (cm)                                  | 40.40(11.90)    | 52.40(21.20) | 12.00 <sup>c</sup> | 0.68 <sup>c</sup> | 0.66 <sup>c</sup> | -0.13, 1.45    |
|                                 | Postural sway locus length EC (cm)                                  | 72.60(37.50)    | 83.70(38.00) | 11.10 <sup>c</sup> | 0.29 <sup>c</sup> | 0.28 <sup>c</sup> | -0.49, 1.06    |
| Tyson 2013 <sup>49</sup>        | FRT (cm)                                                            | NA <sup>b</sup> |              |                    |                   |                   |                |

#### GAIT

|                                 |                              |                 |              |                    |                    |                    |             |
|---------------------------------|------------------------------|-----------------|--------------|--------------------|--------------------|--------------------|-------------|
| Aruin 2012 <sup>46</sup>        | 10m path gait velocity (m/s) | 0.51(0.10)      | 0.34(0.70)   | 0.17               | 0.34               | 0.32               | -0.61, 1.25 |
| Cordo 2009 <sup>39</sup>        | 5m path gait velocity (m/s)  | NA <sup>a</sup> |              |                    |                    |                    |             |
| Lynch 2007 <sup>22</sup>        | 10MWT time (s)               | 21.90(20.88)    | 16.19(11.70) | -5.71 <sup>c</sup> | -0.34 <sup>c</sup> | -0.33 <sup>c</sup> | -1.19, 0.53 |
| Mohapatra<br>2012 <sup>38</sup> | 5m path gait velocity (m/s)  | 0.55(0.20)      | 0.28(0.10)   | 0.27               | 1.77               | 1.62               | 0.25, 2.98  |
| Peurala 2002 <sup>45</sup>      | 10MWT time (s)               | NA <sup>a</sup> |              |                    |                    |                    |             |
| Tyson 2013 <sup>49</sup>        | 10MWT gait velocity (m/s)    | NA <sup>b</sup> |              |                    |                    |                    |             |

#### MOTOR IMPAIRMENT AND LEG FUNCTION (statistically analysed but not meta-analysed)

|                          |                |             |             |      |      |      |             |
|--------------------------|----------------|-------------|-------------|------|------|------|-------------|
| Aruin 2012 <sup>46</sup> | FMA-LE (0-100) | 77.40(3.60) | 76.60(2.60) | 0.80 | 0.25 | 0.24 | -0.69, 1.16 |
|--------------------------|----------------|-------------|-------------|------|------|------|-------------|

|                                     |                                           |                 |              |                   |                   |                   |             |  |
|-------------------------------------|-------------------------------------------|-----------------|--------------|-------------------|-------------------|-------------------|-------------|--|
| Cordo 2009 <sup>39</sup>            | Days to 90% recovery of ankle DF strength | NA <sup>a</sup> |              |                   |                   |                   |             |  |
|                                     | Days to 90% recovery of ankle PF strength | NA <sup>a</sup> |              |                   |                   |                   |             |  |
| Da Silva Ribeiro 2015 <sup>51</sup> | FMA-balance                               | 12.90(1.80)     | 11.90(1.80)  | 1.00              | 0.56              | 0.54              | -0.19, 1.27 |  |
|                                     | FMA-sensation                             | 19.30(7.50)     | 22.50(2.50)  | -3.20             | -0.57             | -0.56             | -1.29, 0.17 |  |
|                                     | FMA-LE coordination                       | 5.50(1.00)      | 5.30(1.10)   | 0.20              | 0.19              | 0.19              | -0.53, 0.90 |  |
|                                     | FMA-LE motor function                     | 23.40(5.60)     | 24.80(4.50)  | -1.40             | -0.28             | -0.27             | -0.99, 0.45 |  |
| Huzmeli 2017 <sup>41</sup>          | Barthel Index (0-100)                     | 85.76(13.66)    | 68.16(18.01) | 17.60             | 1.10              | 1.07              | 0.24, 1.89  |  |
| Lee 2015 <sup>42</sup>              | TUG (s)                                   | 24.89(8.02)     | 26.38(7.16)  | 1.49 <sup>c</sup> | 0.20 <sup>c</sup> | 0.19 <sup>c</sup> | -0.46, 0.85 |  |
| Lynch 2007 <sup>22</sup>            | ILAS                                      | 0.33(0.50)      | 0.33(1.01)   | 0.00              | 0.00              | 0.00              | -0.86, 0.86 |  |
| Mohapatra 2012 <sup>38</sup>        | FMA-LE (0-100)                            | 89.00(0.90)     | 86.00(4.00)  | 3.00              | 0.99              | 0.71              | -0.51, 1.94 |  |
| Peurala 2002 <sup>45</sup>          | MMAS (0-56)                               | NA <sup>a</sup> |              |                   |                   |                   |             |  |
| Tyson 2013 <sup>49</sup>            | Ankle PF strength                         | NA <sup>b</sup> |              |                   |                   |                   |             |  |
|                                     | Ankle DF strength                         | NA <sup>b</sup> |              |                   |                   |                   |             |  |

---

SD – standard deviation; SMD – standardised mean difference; CI – confidence interval; NA – not applicable (these studies were not included in data synthesis); JPS – joint position sense; DPT – distal proprioception test; RPM – repeated passive movement; RAM – repeated active movement; PAR – passive angle repositioning; AAR – active angle repositioning; VAS – visual analogue scale; SWM – Semmes-Weinstein monofilaments; SEP – somatosensory evoked potentials; BBS – Berg Balance Scale; %BW – percentage of body weight; FRT – Functional Reach Test; 10MWT – 10 metre walk test; FMA-LE – Fugl-Meyer Assessment for lower extremity; PF – plantarflexion; DF – dorsiflexion; TUG – Timed Up and Go test; ILAS - Iowa Level of Assistance Scale; MMAS – modified Motor Assessment Scale.

<sup>a</sup>Study did not have a control group; <sup>b</sup>Study utilised a paired-sample cross-over design; <sup>c</sup>Direction was converted so that improvement in outcomes is expressed as a positive value for all studies; <sup>d</sup>Discrete data; <sup>e</sup>Insufficient information; <sup>f</sup>Seven points on soles of feet - big toe, little toe, first metatarsal, fifth metatarsal, lateral border, medial border, heel. Only data of the little toe (chosen a priori) was analysed to allow for relatively equal weighting across studies.
